# Supplementary material
Source: PubMed Central journal article supplement (PMC2374369)
Supplement: 97320630002271S1.pdf [file 97320630002271S1.pdf]

---

### Supplementary material

$$x_{COM} = \frac{\sum_{i=1}^N m_i x_i}{\sum_{i=1}^N m_i} \quad \rightarrow \quad (1)$$

where  $x_i$  is the x cartesian coordinate of the atom  $i$  and  $m_i$  is its atomic mass (similarly, the y and z coordinates of the center of mass can be calculated).
